# Supplementary material for: Highly concentrated MoS2 nanosheets in water achieved by thioglycolic acid as stabilizer and used as biomarkers
Source: Royal Society of Chemistry journal article supplement (doi:10.1039/c4ra07512a), 2014-01-01
Supplement: c4ra07512a1.pdf [file c4ra07512a1.pdf]

**Supporting information for**

**Highly concentrated MoS<sub>2</sub> nanosheets in water achieved by thioglycolic acid as stabilizer and used as biomarkers**

Rajeshkumar Anbazhagan<sup>1†</sup>, Hsing-Ju Wang<sup>2†</sup>, Hsieh-Chih Tsai<sup>1,\*</sup>, Ru-Jong Jeng<sup>2,\*</sup>

1. Graduate Institute of Applied Science and Technology, National Taiwan University of Science and Technology, Taipei, Taiwan

2. Institute Polymer Science and Engineering, National Taiwan University, Taipei, Taiwan.

[†] These authors contributed equally.

[\*] To whom correspondence and reprint requests should be addressed.

## **Materials:**

Molybdenum disulphide ( $\text{MoS}_2$  10-30  $\mu\text{m}$ ) was purchased from Rose Mill Company (West Hartford USA). Thioglycolic acid (CAS number: 68-11-1) was purchased from Merck Millipore Company (Germany). All solution and reagents were used without any further purification.

## **Characterization**

$\text{MoS}_2$  materials were coated on calcium fluoride pellets and investigated by Infrared spectroscopy (JASCO FTIR-4100). UV-visible spectrum was recorded by the JASCO, V-650 spectrometer. Zeta-potentials of  $\text{MoS}_2$  solutions were analyzed using Horiba sz-100. The  $\text{MoS}_2$  solution was dropped on the holey-carbon grids for TEM observation and on cleaned silica wafer substrates for AFM, Raman and XRD studies. TEM images were obtained by Technai F20 FEI-TEM. AFM images were obtained using Bruker Scanasyt. Raman measurements with the excitation wavelength of 632.8 nm were performed using a Horiba Jobin Yvon Raman HR800. Diffraction patterns were collected from XRD system (Bruker D2 PHASER) with reference  $\text{CuK}\alpha 1$  radiation ( $\lambda = 1.54056 \text{ \AA}$ ). Fluorescence spectroscopy was investigated by using HITACHI, F-7000.

## **Optimize the TGA concentration:**

To determine the optimized concentration of TGA for this reaction, first the  $\text{MoS}_2$  concentration (in water) was fixed at 5 mg/ml to be mixed with various TGA concentrations such as, 0.1, 0.25, 0.5, 1, 1.5 and 2 M. A well suspended solution in water was obtained for the mixtures with a TGA concentration higher than 1 M. When TGA was mixed with  $\text{MoS}_2$  in water, the thiol moiety of TGA would lose the hydrogen and turn into a thiolate group. This thiolate moiety partially gave an electron to a vacant site of  $\text{MoS}_2$  to promote the thiol

chemistry reaction. This would reduce the re-stacking nature of MoS<sub>2</sub>. Due to the depression of hydrophobic nature and Van der Waals force between the MoS<sub>2</sub> layers in the presence of TGA, successful exfoliation of MoS<sub>2</sub> in water was achieved.

### Measurement of concentration of MoS<sub>2</sub> monolayers

To measure the dispersion concentration of MoS<sub>2</sub> monolayers in the supernatant from centrifugation, we calculated the weight of the MoS<sub>2</sub> monolayers. A measured 20 ml of dispersion was filtered under high vacuum on a membrane filter of known weight. The obtained film was dried in a vacuum oven at 75 C° for 24 h. The mass of the MoS<sub>2</sub> nanosheets on film was taken from a microbalance.

$$\begin{aligned} \text{Concentration} &= \frac{\text{Membrane weight with sample} - \text{Empty Membrane weight}}{\text{Total Volume of the Solvent}} \\ &= \frac{0.3171 - 0.1219}{0.02} \\ &= 9.76 \text{ mg/ml} \end{aligned}$$

| Sonication time | Concentration (yield) of MoS <sub>2</sub> |
|-----------------|-------------------------------------------|
| 2 h             | 3.49 mg/ml                                |
| 3 h             | 5.64 mg/ml                                |
| 5 h             | 9.76 mg/ml                                |
